# Supplementary material for: The Role of Problem Specification in Crowdsourcing Contests for Design Problems: A Theoretical and Empirical Analysis
Source: Atypon-hosted journal article supplement (doi:10.1287/msom.2020.0873), 2020-05-21
Supplement: msom.2020.0873.sm1.pdf [file msom.2020.0873.sm1.pdf]

---

## Online Appendices

### EC.1. Examples of the Types of Information in Problem Specifications in the Data

Table EC.1 Three Examples of the Types of Information in Problem Specifications in the Data

| Company     | Industry                               | Q3 (Conceptual objectives)                                                                                                                                                                                                                               | Q4 (Execution Guidance)                                                                                                                | Q5 (Execution Guidance)                                                                         |
|-------------|----------------------------------------|----------------------------------------------------------------------------------------------------------------------------------------------------------------------------------------------------------------------------------------------------------|----------------------------------------------------------------------------------------------------------------------------------------|-------------------------------------------------------------------------------------------------|
| Quackers    | Retailing                              | It's a fun brand for kids. Very happy, upbeat and never quit on your dreams. Community and fun.                                                                                                                                                          | Image only. A cartoon duck with a sailor hat - not too much like Donald Duck. The hat should be green, the duck bill should be yellow. | Duck face a bit like this but with hat and less body visible. (A hyperlink to company website). |
| Intertwined | Consulting and Professional Services   | We want to generate a sense of progress to our customers, as well as communicate that we are a professional organization. We're here to help our clients cut through industry baggage to help them really focus on what will help them do business well. | Image with the company name, or image only. We won't consider text only logos.                                                         | None                                                                                            |
| Rise        | Social Media Advertising and Marketing | We are looking for a design that is professional but not too corporate. We want to convey reliability, fun and professionalism.                                                                                                                          | None.                                                                                                                                  | Not really.                                                                                     |

### EC.2. Image Comparison Algorithm – SIFT

To classify designers' submissions into "distinct designs" and "variations" in our large-scale data, we employ *Scale-Invariant Feature Transform (SIFT)*. SIFT is an algorithm proposed by Lowe (1999) that detects and describes local features in images, and comprises four steps: (1) *Extract SIFT Feature Vectors*: From a pair of images (A and B), descriptors of the key points are extracted by identifying *SIFT feature vectors* in scale space; these vectors are constructed to robustly capture the structural properties of the images. (2) *Match SIFT Feature Vectors*: For each feature vector  $D_i^A$  in image A, its shortest Euclidean distance ( $d(D_i^A, D_j^B)$ ) to each of the SIFT feature vectors in image B ( $D_j^B$ ) is calculated. Feature vectors  $D_i^A$  and  $D_k^B$  are defined as a matched pair if and only if  $\frac{d(D_i^A, D_k^B)}{d(D_i^A, D_j^B)} < 2/3$  for all  $j$ . (This is the default threshold in Lowe's paper (1999), essentially the nearest-neighbor approach.) (3) *Compute Similarity Ratio*: Let  $\gamma_{A,B} = \frac{N_{A,B}^m}{\min\{N_A, N_B\}}$ , where  $N_{A,B}^m$  is the number of matched pairs between image A and image B, and  $N_A$  ( $N_B$ ) is the total number of feature vectors extracted from image A (B). (4) *Classify Images Pairs as Similar or Different*: Similarity Ratio  $\gamma_{A,B}$  is used to classify images A and B as either similar or different. The higher the ratio, the more similar the two images are (a ratio of 1 means the two images are exactly the same). In our empirical analysis, we classify two submissions as similar if  $\gamma_{A,B} \geq 0.4$ . If a designer's new submission (a logo image) is very similar to any of her prior submissions (based on the SIFT score), we classify the new submission as a "variation"; otherwise, we consider the new submission a "distinct design".

### EC.3. Power Analysis

We use power analyses to evaluate the ability of our empirical study to detect variables characterizing the problem specification that have an impact on the number of participants ( $(No.Designers)_q$ ) and designers' trial efforts ( $(No.Submissions)_{i,q}$ ). Based on the R-squares before and after the inclusion of problem specification-related variables and an alpha level of 0.05 with Bonferroni adjustment, the sample size analysis indicates that we need sample sizes of 174, 182 and 2987 to achieve a power of 0.8 to detect variables characterizing the problem specification in Table 2's Columns (1)(3)(5) respectively. With our current sample sizes, we have enough data to detect any significant variables. Equivalently, we can calculate a post-hoc level of statistical power. With our current sample sizes, we can achieve a power above 0.95 in all regressions, indicating that our tests have adequate statistical power.

## EC.4. Additional Empirical Results about the Impact of Problem Specification

**Table EC.2 Impact of Different Categories of Execution Guidelines on No.Submissions Per Designer**

|                                           | Dependent Variable:<br>( <i>No Submission</i> ) <sub>i,q</sub> | In Post-Update<br>Multiple-Choice<br>Questions? |
|-------------------------------------------|----------------------------------------------------------------|-------------------------------------------------|
| <b>Elements of Execution Guidance</b>     |                                                                |                                                 |
| <i>Colors Dummy</i>                       | 0.177* (0.083)                                                 | Yes                                             |
| <i>Logo Style Dummy</i>                   | 0.101 (0.105)                                                  | Yes                                             |
| <i>Shapes Dummy</i>                       | 0.214* (0.097)                                                 | No                                              |
| <i>Font Dummy</i>                         | 0.029 (0.116)                                                  | Yes                                             |
| <i>Usage Dummy</i>                        | 0.239** (0.078)                                                | Yes                                             |
| <i>Art Styles Dummy</i>                   | 0.163* (0.077)                                                 | No                                              |
| <i>Resources Dummy</i>                    | 0.132 (0.076)                                                  | No                                              |
| <b>Control Variables</b>                  |                                                                |                                                 |
| ( <i>No.Concepts</i> ) <sub>q</sub>       | 0.013 (0.010)                                                  |                                                 |
| <i>Concept Similarity</i>                 | 0.149 (0.479)                                                  |                                                 |
| ( <i>No.Designers</i> ) <sub>q</sub>      | -0.009* (0.004)                                                |                                                 |
| ( <i>No.Updates</i> ) <sub>q</sub>        | 0.204*** (0.034)                                               |                                                 |
| DoW, Month, Year Dummies                  | Yes                                                            |                                                 |
| Industry, Creator Dummies                 | Yes                                                            |                                                 |
| Observations                              | 11,757                                                         |                                                 |
| R <sup>2</sup> (Adjusted R <sup>2</sup> ) | 0.480 (0.304)                                                  |                                                 |
| Residual Std. Error (F Statistic)         | 3.317 (df = 8790)                                              |                                                 |

Note: \*p<0.05; \*\*p<0.01; \*\*\*p<0.001

**Common vs. Rare Keywords** We measure the keyword usage frequency with Zipf frequency (*ConceptFreq*, which ranges from 0-8, with more frequently used words having large *ConceptFreqs*). (The Zipf frequency of a word is the base-10 logarithm of the number of times it appears per billion words.) For each problem specification, we compute the average and the minimum usage frequency among the manually-coded conceptual objective keywords ((*Avg.ConceptFreq*)<sub>q</sub> and (*Min.ConceptFreq*)<sub>q</sub>). We consider and estimate models in Table EC.3, and find that (*Avg.ConceptFreq*)<sub>q</sub> and (*Min.ConceptFreq*)<sub>q</sub> are both negatively and significantly associated with (*No.Designers*)<sub>q</sub>, suggesting that rare conceptual objective keywords are relatively less discouraging for designers participation.

**Categories vs. Intensities of Execution Guidance** We separately consider the effect of offering more categories of execution guidance ((*No.GuideCats*)<sub>q</sub>), and that of offering more detailed guidance in each category, i.e., more keywords per category ((*No.GuideWords*/*No.GuideCats*)<sub>q</sub>). We regress (*No.Submissions*)<sub>i,q</sub> on both (*No.GuideCats*)<sub>q</sub> and (*No.GuideWords*/*No.GuideCats*)<sub>q</sub>, report the results in Table EC.4, and find that (*No.GuideCats*)<sub>q</sub> is significantly positively associated with (*No.Submissions*)<sub>i,q</sub>, whereas (*No.GuideWords*/*No.GuideCats*)<sub>q</sub> is not.

**Table EC.3 Nuance Findings for Conceptual Objectives – Does Frequency of a Keyword in English Affect Participation?**

|                                                      | Dependent variable: ( <i>No.Designers</i> ) <sub>q</sub> |                   |
|------------------------------------------------------|----------------------------------------------------------|-------------------|
| <b>Conceptual Objectives</b>                         |                                                          |                   |
| ( <i>No.Concepts</i> ) <sub>q</sub>                  | -0.396** (0.137)                                         | -0.604*** (0.124) |
| <i>Concept Similarity</i>                            | 0.176** (0.064)                                          | 0.178** (0.064)   |
| ( <i>Avg.ConceptFreq</i> ) <sub>q</sub>              | -2.776** (0.887)                                         |                   |
| ( <i>Min.ConceptFreq</i> ) <sub>q</sub>              |                                                          | -1.316** (0.405)  |
| <b>Execution Guidance</b>                            |                                                          |                   |
| ( <i>No.GuideWords</i> ) <sub>q</sub>                | -0.042 (0.104)                                           | -0.040 (0.104)    |
| <b>Control Variables</b>                             |                                                          |                   |
| ( <i>len<sub>Q3</sub>/No.Concepts</i> ) <sub>q</sub> | 0.043 (0.130)                                            | -0.037 (0.130)    |
| ( <i>No.Updates</i> ) <sub>q</sub>                   | 0.011 (0.427)                                            | -0.012 (0.427)    |
| DoW, Month, Year, Industry Dummies                   | Yes                                                      | Yes               |
| Observations                                         | 441                                                      | 441               |
| R <sup>2</sup>                                       | 0.271                                                    | 0.272             |
| Adjusted R <sup>2</sup>                              | 0.198                                                    | 0.199             |
| Residual Std. Error (df = 400)                       | 9.392                                                    | 9.383             |
| F Statistic                                          | 3.709***                                                 | 3.735***          |

Note: \*p<0.05; \*\*p<0.01; \*\*\*p<0.001

**Table EC.4 Nuance Findings for Nested Structure of Execution Guidance**

|                                                             | Dependent variable:<br>( <i>No.Submissions</i> ) <sub>i,q</sub> |
|-------------------------------------------------------------|-----------------------------------------------------------------|
| <b>Conceptual Objectives</b>                                |                                                                 |
| ( <i>No.Concepts</i> ) <sub>q</sub>                         | 0.010 (0.010)                                                   |
| <i>Concept Similarity</i>                                   | 0.002 (0.005)                                                   |
| <b>Execution Guidance</b>                                   |                                                                 |
| ( <i>No.GuideCats</i> ) <sub>q</sub>                        | 0.172*** (0.025)                                                |
| ( <i>No.GuideWords</i> / <i>No.GuideCats</i> ) <sub>q</sub> | 0.048 (0.052)                                                   |
| <b>Control Variables</b>                                    |                                                                 |
| ( <i>No.Designers</i> ) <sub>q</sub>                        | -0.010* (0.004)                                                 |
| ( <i>No.Updates</i> ) <sub>q</sub>                          | 0.199*** (0.034)                                                |
| Day-of-Week Fixed Effects                                   | Yes                                                             |
| Month Fixed Effects                                         | Yes                                                             |
| Year Fixed Effects                                          | Yes                                                             |
| Industry Fixed Effects                                      | Yes                                                             |
| Creator Fixed Effects                                       | Yes                                                             |
| Observations                                                | 11,509                                                          |
| R <sup>2</sup>                                              | 0.483                                                           |
| Adjusted R <sup>2</sup>                                     | 0.306                                                           |
| Residual Std. Error                                         | 3.333 (df = 8576)                                               |
| F Statistic                                                 | 2.729***                                                        |

Note: \*p<0.05; \*\*p<0.01; \*\*\*p<0.001

## EC.5. Additional Tables

**Data evidence for problem framing cost increasing with conceptual objectives.** Table EC.5 reports the results of the regression of coders' reading time for a problem specification on the characteristics of the problem specification. The results suggest that the coders spend more time reading problem specifications with more conceptual objectives, but not on those with more execution guidelines. This supports our modeling assumption that the problem-framing cost only changes with the number of conceptual objectives.

**Table EC.5 Regression of Reading Time**

| Dependent Variable: $(ReadingTime)_q$ |                  |                                           |               |
|---------------------------------------|------------------|-------------------------------------------|---------------|
| $(No.Concepts)_q$                     |                  | 0.071***                                  | (0.004)       |
| $(len_{Q3}/No.Concepts)_q$            |                  | 0.054***                                  | (0.004)       |
| $(No.GuideWords)_q$                   |                  | 0.001                                     | (0.003)       |
| Observations                          | 441              | R <sup>2</sup> (Adjusted R <sup>2</sup> ) | 0.622 (0.587) |
| Residual Std. Error                   | 0.304 (df = 403) | F Statistic                               | 17.889***     |

Note: \*p<0.05; \*\*p<0.01; \*\*\*p<0.001

**Robustness checks – alternative measures for designer trial efforts.** As we can see from Table EC.6, the two new measures for designer  $i$ 's trial effort,  $(No.DesignStyle)_{i,q}$  and  $(Variations/Style)_{i,q}$ , are both significantly positively correlated with  $(No.GuideWords)_q$ , but neither is significantly associated with  $(No.Concepts)_q$ , which again supports Hypotheses 2a and 2b – more seeker execution guidance leads to more submissions from each designer (both in terms of “distinct designs” and their “variations”), but more conceptual objectives do not.

**Robustness checks – sub-sample tests only with contests that did not have updates.** The results reported in Table EC.7 are qualitatively the same as those estimated with the full sample (reported in Table 2), indicating that the main findings are not affected by how we control for  $(No.Updates)_q$ .

**Table EC.6 Robustness Checks for Equation (8)  
(Alternative Measures for Trial Efforts)**

|                                 | Dependent Variable:      |                            |
|---------------------------------|--------------------------|----------------------------|
|                                 | $(No.DesignStyle)_{i,q}$ | $(Variations/Style)_{i,q}$ |
| <b>Conceptual Objectives</b>    |                          |                            |
| $(No.Concepts)_q$               | 0.001 (0.003)            | 0.010 (0.006)              |
| Concept Similarity              | -0.000 (0.001)           | -0.000 (0.003)             |
| <b>Execution Guidance</b>       |                          |                            |
| $(No.GuideWords)_q$             | 0.006** (0.002)          | 0.028*** (0.005)           |
| <b>Control Variables</b>        |                          |                            |
| $(len_{Q3}/No.Concepts)_q$      | 0.001 (0.003)            | 0.011 (0.006)              |
| $(No.Designers)_q$              | -0.0004 (0.001)          | -0.006** (0.002)           |
| $(No.Updates)_q$                | 0.060*** (0.009)         | 0.042* (0.019)             |
| Day-of-Week Fixed Effects       | Yes                      | Yes                        |
| Month Fixed Effects             | Yes                      | Yes                        |
| Year Fixed Effects              | Yes                      | Yes                        |
| Industry Fixed Effects          | Yes                      | Yes                        |
| Creator Fixed Effects           | Yes                      | Yes                        |
| Observations                    | 11,757                   | 11,757                     |
| R <sup>2</sup>                  | 0.396                    | 0.403                      |
| Adjusted R <sup>2</sup>         | 0.193                    | 0.202                      |
| Residual Std. Error (df = 8795) | 0.890                    | 1.895                      |
| F Statistic (df = 2961; 8795)   | 1.949***                 | 2.003***                   |

Note: \*p<0.05; \*\*p<0.01; \*\*\*p<0.001

**Table EC.7 Sub-Sample Tests Containing Only  
Contests that Did Not Have Updates**

|                                             | Dependent Variables: |                          |                   |
|---------------------------------------------|----------------------|--------------------------|-------------------|
|                                             | $(No.Designers)_q$   | $(No.Submissions)_{i,q}$ |                   |
| <b>Conceptual Objectives</b>                |                      |                          |                   |
| $(No.Concepts)_q$                           | -0.498* (0.196)      | -0.665*** (0.173)        | 0.025 (0.013)     |
| Concept Similarity                          | 0.173 (0.095)        | 0.163* (0.077)           | 0.000 (0.006)     |
| <b>Very Short Objectives</b>                |                      |                          |                   |
| $(No.Concepts)_q * \mathbb{I}_q^{ShortCpt}$ | -5.101 (2.708)       |                          |                   |
| $\mathbb{I}_q^{ShortCpt}$                   | 16.513* (7.822)      |                          |                   |
| <b>Execution Guidance</b>                   |                      |                          |                   |
| $(No.GuideWords)_q$                         | -0.016 (0.141)       | -0.042 (0.141)           | 0.046*** (0.011)  |
| <b>Control Variables</b>                    |                      |                          |                   |
| $(len_{Q3}/No.Concepts)_q$                  | -0.087 (0.191)       | -0.002 (0.184)           | 0.019 (0.013)     |
| $(No.Designers)_q$                          |                      |                          | 0.002 (0.005)     |
| Day-of-Week Fixed Effects                   | Yes                  | Yes                      | Yes               |
| Month Fixed Effects                         | Yes                  | Yes                      | Yes               |
| Year Fixed Effects                          | Yes                  | Yes                      | Yes               |
| Industry Fixed Effects                      | Yes                  | Yes                      | Yes               |
| Creator Fixed Effects                       | No                   | No                       | Yes               |
| Observations                                | 260                  | 260                      | 6,968             |
| R <sup>2</sup>                              | 0.325                | 0.309                    | 0.548             |
| Adjusted R <sup>2</sup>                     | 0.201                | 0.190                    | 0.338             |
| Residual Std. Error                         | 9.505 (df = 219)     | 9.573 (df = 221)         | 3.056 (df = 4758) |
| F Statistic                                 | 2.632***             | 2.595***                 | 2.614***          |

Note:

\*p<0.05; \*\*p<0.01; \*\*\*p<0.001

## EC.6. Properties of $S_r^{\text{gs}}$ and $S_r^{\text{ic}}$

The following lemmas characterize  $S_r^{\text{gs}}$  and  $S_r^{\text{ic}}$ .

LEMMA 4. *If  $S_r^{\text{gs}}$  exists, then it is unique and divides the number of conceptual objectives the seeker discloses into two regions. Region 0: when  $S_r \leq S_r^{\text{gs}}$ , designers are willing to guess and incorporate more than the disclosed objectives (i.e.,  $S_r < \bar{r}^g(N_0^*(S_r))$ ); Region I: when  $S_r > S_r^{\text{gs}}$ , designers do not guess and only incorporate from the disclosed objectives (i.e.,  $S_r \geq \bar{r}^g(N_0^*(S_r))$ ).*

LEMMA 5. *There exists a unique  $S_r^{\text{ic}}$ .  $S_r^{\text{ic}}$  divides the number of conceptual objectives the seeker discloses into two regions. Region I: when  $S_r \leq S_r^{\text{ic}}$ , designers are willing to incorporate all the disclosed objectives (i.e.,  $S_r \leq \bar{r}(N_2^*(S_r))$ ); Region II: when  $S_r > S_r^{\text{ic}}$ , designers incorporate only a subset of all the disclosed objectives (i.e.,  $S_r > \bar{r}(N_2^*(S_r))$ ).*

We prove Lemmas 4-5 by: (A)  $S_r^{\text{ic}}$  exists, (B)  $S_r^{\text{ic}}$  is unique, (C) if  $S_r^{\text{gs}}$  exists,  $S_r^{\text{gs}} < S_r^{\text{ic}}$  and  $S_r^{\text{gs}}$  is unique.

**(A) Existence of  $S_r^{\text{ic}}$ .** We prove  $S_r^{\text{ic}}$  exists by showing:

LEMMA 6. (1)  $\exists S_r \rightarrow 0$  s.t.  $\bar{r}(N_2^*(S_r)) \geq S_r$ , and (2)  $\exists S_r > 0$  s.t.  $\bar{r}(N_2^*(S_r)) < S_r$ .

We now provide proofs for (1) and (2) in Lemma 6. (1) By assumption,  $r^* = S_r$  if  $S_r$  is sufficiently small (see Section 3.3), hence we know that  $\exists S_r \rightarrow 0$  s.t.  $\bar{r}(N_2^*(S_r)) \geq S_r$ . (2) We are interested in studying contests where  $N^* > 1$  (see Section 3.3); hence, under the problem parameters we focus on,  $\exists S_r$  s.t.  $N^*(S_r) > 1$ . This implies when  $S_r$  is sufficiently small,  $N^* > 1$ , since when  $S_r$  increases,  $N^*$  decreases (shown in Appendix A). On the other hand, when  $S_r$  becomes extremely large, the number of participating designers approaches zero:  $\lim_{S_r \rightarrow \infty} N^*(S_r) = 0$  (both  $\lim_{S_r \rightarrow \infty} N_1^*(S_r) = 0$ , and  $\lim_{S_r \rightarrow \infty} N_2^*(S_r) = \lim_{S_r \rightarrow \infty} \frac{\sqrt{4Y(X+1)+X^2-X}}{2Y} = 0$  (by L'Hopital's Rule)). Hence, given continuity of  $N^*(S_r)$ ,  $\exists S_r > 0$  s.t.  $N^*(S_r) = 1$  (denoted as  $S_{r,N=1}$ ). If the seeker discloses  $S_{r,N=1}$  conceptual objectives, the number of objectives designers are willing to incorporate is  $\lim_{S_r \rightarrow S_{r,N=1}} \bar{r}(N^*(S_r)) = \lim_{S_r \rightarrow S_{r,N=1}} \bar{r}(N^*=1) = -\infty$ , which implies  $\bar{r}(N^*(S_r)) < S_r$ , and thus the number of participating designers in the equilibrium is  $N_2^*$ . Hence,  $\exists S_r$  s.t.  $\bar{r}(N_2^*(S_r)) < S_r$ .

**(B) Uniqueness of  $S_r^{\text{ic}}$ .** If there are multiple  $S_r^{\text{ic}}$ 's s.t.  $S_r^{\text{ic}} = \bar{r}(N_2^*(S_r^{\text{ic}}))$ , call the smallest one among them  $S_r^{\text{ic}(1)}$ . Lemma 6 implies that  $\frac{\partial \bar{r}(N_2^*(S_r))}{\partial S_r} \Big|_{S_r^{\text{ic}(1)}} \leq 1$ . Next, at any point  $S_r$ , we can compare the left and right limits of  $\frac{\partial \bar{r}(N_2^*(S_r))}{\partial S_r}$ , namely left limit  $\lim_{S_r \rightarrow S_r^-} \frac{\Delta \bar{r}(N_2^*(S_r))^-}{\Delta S_r} = \frac{\bar{r}(N_2^*(S_r)) - \bar{r}(N_2^*(S_r - \Delta S_r))}{\Delta S_r}$ , and right limit

$\lim_{S_r \rightarrow S_r^+} \frac{\Delta \bar{r}(N_2^*(S_r))^{+}}{\Delta S_r} = \frac{\bar{r}(N_2^*(S_r + \Delta S_r)) - \bar{r}(N_2^*(S_r))}{\Delta S_r}$ . Note that  $\bar{r}(N_2^*(S_r))$  is a function of  $S_r$  through the equilibrium number of participating designers ( $N_2^*$ ). Hence, corresponding to the left and right limits, we can define the

changes in  $N_2^*$  as  $\Delta N_2^{*-}$  and  $\Delta N_2^{*+}$  respectively. Algebra based on Equation (A.6) implies that,  $\frac{\partial N_2^*}{\partial S_r} < 0$  and  $\frac{\partial^2 N_2^*}{\partial S_r^2} > 0$ , from which we know  $|\Delta N_2^{*+}| < |\Delta N_2^{*-}|$  (i.e., the number of participants decreases with  $S_r$  at a decreasing speed).

Based on the formula for  $\bar{r}(N_2^*)$ , we can write  $\Delta \bar{r}$  as a function of  $\Delta N_2^*$ :  $\Delta \bar{r} = \left( \frac{N_2^{*-} |\Delta N_2^*| - 1}{(N_2^{*-} |\Delta N_2^*|)^2 (N_2^* - 1)} \right) / (\ln \frac{1}{p})$ . Now, we can compare  $\lim_{S_r \rightarrow S_r^-} \frac{\Delta \bar{r}^-}{\Delta S_r}$  and  $\lim_{S_r \rightarrow S_r^+} \frac{\Delta \bar{r}^+}{\Delta S_r}$ :

- When  $N_2^* > 2$ :  $\frac{\partial \Delta \bar{r}}{\partial |\Delta N_2^*|} > 0$ . In this case,  $\Delta \bar{r}^+ < \Delta \bar{r}^-$  since  $|\Delta N_2^{*+}| < |\Delta N_2^{*-}|$ . Hence,  $\lim_{S_r \rightarrow S_r^+} \frac{\Delta \bar{r}^+}{\Delta S_r} < \lim_{S_r \rightarrow S_r^-} \frac{\Delta \bar{r}^-}{\Delta S_r}$ .
- When  $N_2^* < 2$ :  $\bar{r}$  increases with  $N_2^*$ , so decreases with  $S_r$  ( $\Delta \bar{r}^- < 0$ ,  $\Delta \bar{r}^+ < 0$ ). So  $\lim_{S_r \rightarrow S_r^-} \frac{\Delta \bar{r}^-}{\Delta S_r} < 0$ ,  $\lim_{S_r \rightarrow S_r^+} \frac{\Delta \bar{r}^+}{\Delta S_r} < 0$ .

The assessment of the left and right limits indicates that,  $\frac{\partial \bar{r}}{\partial S_r}$  is either decreasing or negative. Therefore, we have that  $\forall S_r > S_r^{\text{ic}(1)}$ , and  $\frac{\partial \bar{r}}{\partial S_r} \Big|_{S_r} < 1$ . This suggests  $S_r^{\text{ic}(1)}$  is the only  $S_r$ , s.t.  $\bar{r}(N_2^*(S_r)) = S_r$ . This result, combined with Lemma 6, suggests that  $S_r^{\text{ic}}$  divides the number of conceptual objectives the seeker discloses  $S_r$  into two regions: Region I, when  $S_r \leq S_r^{\text{ic}}$ ,  $S_r \leq \bar{r}(N_2^*(S_r))$ ; Region II, when  $S_r > S_r^{\text{ic}}$ ,  $S_r > \bar{r}(N_2^*(S_r))$ .

(C)  $S_r^{\text{gs}} < S_r^{\text{ic}}$ , and  $S_r^{\text{gs}}$  is unique. If  $S_r^{\text{gs}}$  exists,  $S_r^{\text{gs}} < S_r^{\text{ic}}$ , since for any  $N^* = N$ ,  $\bar{r}^g(N) < \bar{r}(N)$ . We prove that  $S_r^{\text{gs}}$  is unique by contradiction. Suppose there are multiple  $S_r^{\text{gs}}$ s, among which the very first one is  $S_r^{\text{gs},1}$  (i.e.,  $\bar{r}^g(N_0^*(S_r^{\text{gs},1})) = S_r^{\text{gs},1}$ ). Then there should be  $S'_r > S_r^{\text{gs},1}$ , under which designers “guess”. However,  $\bar{r}^g(N_0^*(S'_r)) < \bar{r}^g(N_0^*(S_r^{\text{gs},1})) = S_r^{\text{gs},1} < S'_r$ , which suggests that designers cannot be “guessing” under  $S'_r$ . Note the first inequality is from the following facts. We know that  $S'_r > S_r^{\text{gs},1}$  and under both points designers “guess”, and we also know that when designers “guess”,  $N_0^*$  increases with  $S_r$ ; hence,  $N_0^*(S'_r) > N_0^*(S_r^{\text{gs},1})$ . We further know that  $\bar{r}^g$  is a decreasing function of  $N_0^*$ , hence, we get the first inequality.

## EC.7. Extensions

We extend our main model to allow for the following possibilities: (1) overlap/similarity across conceptual objectives; (2) diminishing weights/importance among conceptual objectives. We are able to show in both cases, the qualitative results from the model, hypotheses derived from the model predictions, and the managerial implications (the optimal way of providing problem specifications) remain intact.

### EC.7.1. Extension (I): Overlap Across Conceptual objectives

We extend our main model to consider the level of overlap across conceptual objectives. For example, designers might consider “friendly” and “welcoming” more overlapping than “friendly” and “professional”. Intuitively, satisfying multiple conceptual objectives with a large overlap is likely to be easier than satisfying the same number of objectives with a small overlap; on the other hand, if a design already satisfies one objective, satisfying another objective that overlaps a lot with the first one might only generate limited marginal improvement to the design’s quality. To capture these effects, we make the following adjustments to the main model. Given the level of overlap (denoted as  $1 - \alpha$  where  $\alpha \in [0, 1]$ , i.e., when  $\alpha$  is smaller, objectives overlap significantly), we assume that conditional on one objective being satisfied, (1) the probability that another objective is satisfied by a random design concept generated is  $p^\alpha$  (when objectives are more overlapping,  $p^\alpha$  is closer to 1); (2) the weight carried by any additional objective is  $\alpha w$  (when objectives are more overlapping,  $\alpha w$  is closer to 0). Correspondingly, when a designer incorporates  $r$  objectives, her cost of concept formulation is  $(1/p)^{1+\alpha(r-1)}$ ; and the base quality of her designs is  $w(1+\alpha(r-1))$ . Another way to think about this is that the number of “orthogonal” objectives is  $1+\alpha(r-1)$  (when objectives are almost completely overlapping, the number of “orthogonal” objectives approaches 1; on the other extreme, as the level of overlap goes to zero, the number approaches  $r$ ). We solve for designers’ equilibrium behavior, given the seeker’s problem specification ( $S_r$ ,  $S_g$ , and  $\alpha$ ):

LEMMA 7. *In a crowdsourcing contest, where the equilibrium number of participating designers equals  $N^{\alpha,*}$ , the unique symmetric equilibrium for  $r^{\alpha,*}$  and  $m^{\alpha,*}$  are as follows. The equilibrium number of objectives a designer incorporates is  $r^{\alpha,*} = \begin{cases} \bar{r}^{\alpha,g} & \text{if } S_r < \bar{r}^{\alpha,g} \\ S_r & \text{if } \bar{r}^{\alpha,g} \leq S_r \leq \bar{r} \\ \bar{r}^{\alpha} & \text{if } S_r > \bar{r}^{\alpha} \end{cases}$ , where  $\bar{r}^{\alpha,g} = \frac{\ln(\frac{N^{\alpha,*}-1}{(N^{\alpha,*})^2} \cdot \frac{w}{\mu} \cdot \frac{A}{c_2} \cdot \frac{1}{\ln 1/p} \cdot p^{1-\alpha} - \frac{c_g}{c_2} \frac{1}{\ln(1/p)} \cdot p^{1-\alpha})}{\alpha \ln \frac{1}{p}}$  and  $\bar{r}^{\alpha} = \frac{\ln(\frac{N^{\alpha,*}-1}{(N^{\alpha,*})^2} \cdot \frac{w}{\mu} \cdot \frac{A}{c_2} \cdot \frac{1}{\ln 1/p} \cdot p^{1-\alpha})}{\alpha \ln \frac{1}{p}}$ ; and the equilibrium number of design trials each designer generates is  $m^{\alpha,*} = \frac{A(N^{\alpha,*}-1)}{(N^{\alpha,*})^2 c_3}$ , where  $c_3 = h(S_g)$ . The equilibrium number of participating designers ( $N^{\alpha,*}$ ) first increases (when  $S_r < \bar{r}^{\alpha,g}$ ) and then decreases (when  $S_r \geq \bar{r}^{\alpha,g}$ ) with more disclosed conceptual objectives  $S_r$ ; but  $N^{\alpha,*}$  does not change with the amount of execution guidance  $S_g$ .*

Lemma 7 generalizes Theorem 1, and considers the level of overlap among conceptual objectives. This lemma has the same intuition as Theorem 1 — the direction of the relationship between designers’ equilibrium behaviors and the number of conceptual objectives and execution guidelines in seekers’ problem specification remains unchanged; and Takeaways 1-2 also remain intact. Note that this extension provides an additional insight: when the number of disclosed conceptual objectives is moderate or large (designers do not guess and incorporate undisclosed conceptual objectives), as  $\alpha$  decreases (i.e., the level of overlap increases), the number of participating designers increases (first strictly increases, and then stays the same). We in fact find empirical support for this additional insight: the number of participating designers in a contest increases with the semantic similarity (*Concept Similarity* on a scale of 1-100) among the manually coded keywords for conceptual objectives (see Table 2 Column (3) for the detailed regression results). Furthermore, our recommendation that seekers should disclose as much execution guidance as possible, but disclose conceptual objectives only up to a certain level stays the same (hence Takeaway 3 remain intact). The proofs are straight-forward generalization of proofs in Appendices A and C, omitted to save space.

### EC.7.2. Extension (II): Descending Weights Among Conceptual Objectives

We extend our main model to consider the possibility that conceptual objectives could carry different weights/importance to the seeker. Each conceptual objective (denoted as  $s_r$ ) carries a weight of  $w_{s_r}$ , which represents the quality improvement of a design if this additional objective  $s_r$  is satisfied. The seeker’s objectives ( $s_r = 1, \dots, \bar{S}_r$ ) are sorted in descending importance, with smaller  $s_r$  indicating more important objectives (i.e.,  $w_{s_r}$  is decreasing with  $s_r$ ). We assume  $w_{s_r} = w\Phi^{s_r-1}$ , where  $\Phi \in [0, 1]$ . The parameter  $\Phi$  captures how “skewed” the distribution of  $w_{s_r}$  is, i.e., when  $\Phi$  is large, all the objectives are very similar in terms of their importance to the seeker; whereas when  $\Phi$  is small, the importance drops quickly with  $s_r$ , and only a small number of objectives are important. We assume that  $w_{s_r}$  is common knowledge. As objectives are equally difficult to achieve but of different importance, the seeker would always want to disclose objectives in the order of decreasing importance (i.e., from the most important to the least important). Given the seeker’s problem specification ( $S_r$ ,  $S_g$ , and  $\Phi$ ) we solve for designers’ equilibrium behavior:

LEMMA 8. *In a crowdsourcing contest, where the equilibrium number of participating designers equals  $N^{\Phi,*}$ , the unique symmetric equilibrium for  $r^{\Phi,*}$  and  $m^{\Phi,*}$  are as follows. The equilibrium number of objectives a designer incorporates is  $r^{\Phi,*} = \begin{cases} \bar{r}^{\Phi,g} & \text{if } S_r < \bar{r}^{\Phi,g} \\ S_r & \text{if } \bar{r}^{\Phi,g} \leq S_r \leq \bar{r} \\ \bar{r}^{\Phi} & \text{if } S_r > \bar{r}^{\Phi} \end{cases}$ , where  $\bar{r}^{\Phi,g} = \frac{\ln(\frac{N^{\Phi,*}-1}{(N^{\Phi,*})^2} \cdot \frac{\nu w}{\mu(1-\Phi)} \cdot \frac{A}{c_2} \cdot \frac{\ln 1/\Phi}{\ln 1/p} - \frac{c_g}{c_2} \cdot \frac{\ln 1/\Phi}{\ln 1/p})}{\ln \frac{1}{p^\Phi}}$  and  $\bar{r}^{\Phi} = \frac{\ln(\frac{N^{\Phi,*}-1}{(N^{\Phi,*})^2} \cdot \frac{w}{\mu(1-\Phi)} \cdot \frac{A}{c_2} \cdot \frac{\ln 1/\Phi}{\ln 1/p})}{\ln \frac{1}{p^\Phi}}$ ; and the equilibrium number of design trials each designer generates is  $m^{\Phi,*} = \frac{A(N^{\Phi,*}-1)}{(N^{\Phi,*})^2 c_3}$ , where  $c_3 = h(S_g)$ . The equilibrium number of participating designers ( $N^{\Phi,*}$ ) first increases (when  $S_r < \bar{r}^{\Phi,g}$ ) and then decreases (when  $S_r \geq \bar{r}^{\Phi,g}$ ) with more disclosed conceptual objectives  $S_r$ ; but  $N^{\Phi,*}$  does not change with the amount of execution guidance  $S_g$ .*

Lemma 8 generalizes Theorem 1, and considers the possible descending weights/importance among conceptual objectives. It has the same intuition as Theorem 1: the direction of the relationship between designers’ equilibrium behaviors and the numbers of conceptual objectives and execution guidelines in the seeker’s problem specification remains unchanged; and Takeaways 1-2 remain intact. Furthermore, our recommendation that it is optimal for seekers to disclose as much execution guidance as possible stays the same, and

our suggestion that seekers should only disclose conceptual objectives up to a certain level becomes even more salient (hence Takeaway 3 remain intact). Intuitively, as the importance of the conceptual objectives decreases with  $s_r$ , the quality improvement from incorporating an additional objective is smaller (a lower “quality effect”). Yet, the negative “competition effect” from disclosing more conceptual objectives remains (a higher cost for designers to digest and incorporate disclosed conceptual objectives, which lowers the number of participating designers). The proofs are straightforward generalization of proofs in Appendix A and Appendix C, which we omit here given the limited space.

### EC.8. Proof for Lemma 2

We denote  $\Pi_s$  in Scenario 1 (defined in Appendix C) as  $\Pi_s^1$ . In Scenario 1, all designers incorporate all the disclosed objectives ( $S_r$ ). In this case, the seeker solves the following optimization problem:

$$\max_{S_r \leq \bar{S}_r} \Pi_s^1(S_r; S_g) = \max_{S_r \leq \bar{S}_r} w \cdot S_r + \mu \ln A(1 - \frac{1}{N_1^*(S_r)}) - \mu \ln(h(S_g)), \text{ where } N_1^* \text{ is from Equation (A.5)}. \quad (\text{EC.1})$$

#### EC.8.1. With Zero Cost for Designers to Digest Each Conceptual objective (i.e., $c_1 = 0$ )

We calculate the second derivative of  $\Pi_s^1(S_r; S_g|c_1 = 0)$  with respect to  $S_r$  as follows:

$$\frac{\partial^2 \Pi_s^1(S_r; S_g|c_1=0)}{\partial S_r^2} = -\frac{\mu c_2^2 \ln^2 \frac{1}{p} (\frac{1}{p})^{S_r} [c_2 (\frac{1}{p})^{S_r} + 2s(1-B)]}{4A^2 B^3 (B-1)^2} < 0, \text{ where } B = \sqrt{\frac{c_2 (\frac{1}{p})^{S_r} + s}{A}} = \frac{1}{N^*} \in (0, 1], \quad (\text{EC.2})$$

which shows  $\Pi_s^1(S_r; S_g|c_1 = 0)$  is a concave function w.r.t  $S_r$ .

**Maximum of  $\Pi_s^1(S_r; S_g|c_1 = 0)$ :** For a concave function  $\Pi_s^1(S_r; S_g|c_1 = 0)$ , the global maximum is reached when  $\frac{\partial \Pi_s^1(S_r; S_g|c_1=0)}{\partial S_r} = 0$ . We can write this F.O.C. as  $[x \ln \frac{1}{p} c_2 \mu + 2w(s + x c_2)]^2 = 4w^2 A(s + x c_2)$ , where  $x := (\frac{1}{p})^{S_r}$ . The roots for this quadratic function are:

$$\begin{cases} x_1 = \frac{2[-\sqrt{c_2^2 A w^2 (A w^2 + s \mu^2 \ln^2 \frac{1}{p} + 2s \mu w \ln \frac{1}{p})} + (c_2 w^2 (A - 2s) - c_2 s \mu w \ln \frac{1}{p})]}{c_2^2 (\mu \ln \frac{1}{p} + 2w)^2}, \\ x_2 = \frac{2[\sqrt{c_2^2 A w^2 (A w^2 + s \mu^2 \ln^2 \frac{1}{p} + 2s \mu w \ln \frac{1}{p})} + (c_2 w^2 (A - 2s) - c_2 s \mu w \ln \frac{1}{p})]}{c_2^2 (\mu \ln \frac{1}{p} + 2w)^2}. \end{cases} \quad (\text{EC.3})$$

Because  $c_2^2 A w^2 (A w^2 + s \mu^2 \ln^2 \frac{1}{p} + 2s \mu w \ln \frac{1}{p}) - (c_2 w^2 (A - 2s) - c_2 s \mu w \ln \frac{1}{p})^2 = c_2^2 s w^2 (A - s) (\mu \ln \frac{1}{p} - 2w)^2 > 0$ , we know that  $x_1 < 0$ ,  $x_2 > 0$ . Hence,  $x_2$  is the unique maximum (by definition,  $x = (\frac{1}{p})^{S_r}$  is positive). Therefore, the optimal number of conceptual objectives to disclose is  $S_{r,c_1=0}^{1*} = \min\{\bar{S}_r, \frac{\ln x_2}{\ln(1/p)}\}$ , where  $x_2$  is from Equation (EC.3).

**EC.8.2. With Positive Cost for Designers to Digest Each Conceptual Objective (i.e.,  $c_1 > 0$ )**  
**0) The Seeker’s Profit  $\Pi_s^1$  is Eventually Decreasing with  $S_r$ .** As mentioned in Section 3.3, we are interested in studying contests where  $N^* > 1$ ; hence, under the problem parameters we focus on,  $\exists S_r$  s.t.  $N^*(S_r) > 1$ . This implies when  $S_r$  is sufficiently small,  $N^* > 1$ , since when  $S_r$  increases,  $N^*$  further decreases (shown in Appendix A). Also, when  $S_r$  is sufficiently small, specifically,  $S_r \leq S_r^{ic}$ , the equilibrium number of participating designers is  $N_1^*$ , and thus  $N_1^* > 1$ . On the other hand, when  $S_r$  becomes extremely large,  $N_1^*$  is approaching zero:  $\lim_{S_r \rightarrow \infty} N_1^*(S_r) = 0$ . Hence, given continuity of  $N_1^*(S_r)$ ,  $\exists S_r > 0$  s.t.  $N_1^*(S_r) = 1$  (we denote it as  $S_{r,N_1^*=1}$ ).

While  $S_r$  increases and approaches  $S_{r,N_1^*=1}$ , the seeker’s profit is approaching to negative infinity, i.e.,  $\lim_{S_r \rightarrow S_{r,N_1^*=1}} \Pi_s^1(S_r; S_g) = \lim_{S_r \rightarrow S_{r,N_1^*=1}} w \cdot S_r + \mu \ln A(1 - \frac{1}{N_1^*(S_r)}) - \mu \ln(h(S_g)) = -\infty$ . Therefore, the seeker profit

$\Pi_s^1$  is eventually decreasing with a high enough  $S_r$ , which suggests  $S_r^{1*} < \infty$ , i.e., the seeker should not always disclose all of his conceptual objectives in Scenario 1 (i.e., even if designers are “required” to incorporate all the disclosed conceptual objectives).

**Optimal Number of Conceptual Objectives to Disclose ( $S_r^{1*}$ ) is Bounded Above by  $S_{r,c_1=0}^{1*}$ .** We first show that the seeker’s profit always decreases with the unit cost for designers to frame the design problem (i.e., a higher  $c_1$ ).  $\frac{\partial \Pi_s^1(S_r; S_g)}{\partial c_1} = \frac{\partial \Pi_s^1(S_r; S_g)}{\partial N_1^*} \frac{\partial N_1^*}{\partial c_1} < 0$  (according to Equation (EC.1)). Hence,  $\Pi_s^1(S_r; S_g | c_1 > 0) < \Pi_s^1(S_r; S_g | c_1 = 0)$ , i.e., the seeker’s profit is always lower when there is positive cost for designers to frame the design problem. In addition, based on algebra, we have  $\frac{\partial \frac{\partial \Pi_s^1(S_r; S_g)}{\partial S_r}}{\partial c_1} = -\mu \ln'(1 - \frac{1}{N_1^*}) \frac{\partial \frac{1}{N_1^*}}{\partial c_1} < 0$ , suggesting

$$\frac{\partial \Pi_s^1(S_r; S_g | c_1 \geq 0)}{\partial S_r} \leq \frac{\partial \Pi_s^1(S_r; S_g | c_1 = 0)}{\partial S_r}. \quad (\text{EC.4})$$

Recall that,  $\Pi_s^1(S_r; S_g | c_1 = 0)$  is concave and maximized at  $S_{r,c_1=0}^{1*}$ ; thus,  $\frac{\partial \Pi_s^1(S_r; S_g | c_1 = 0)}{\partial S_r} |_{S_r > S_{r,c_1=0}^{1*}} < 0$ . Combining this with Equation (EC.4), we have  $\frac{\partial \Pi_s^1(S_r; S_g | c_1 \geq 0)}{\partial S_r} |_{S_r > S_{r,c_1=0}^{1*}} \leq \frac{\partial \Pi_s^1(S_r; S_g | c_1 = 0)}{\partial S_r} |_{S_r > S_{r,c_1=0}^{1*}} < 0$ . In other words, when  $S_r$  is greater than  $S_{r,c_1=0}^{1*}$ , the seeker’s profit is always decreasing with  $S_r$ . Hence, the global maximum of  $\Pi_s^1(S_r; S_g)$  is bounded above by  $S_{r,c_1=0}^{1*}$ . Furthermore, based on simulations in Appendix C, we find that  $S_r^{1*}$  is not very sensitive to  $c_1$ , suggesting that the maximum  $S_{r,c_1>0}^{1*}$  is relatively close to  $S_{r,c_1=0}^{1*}$ .

### EC.9. Proof of Lemma 3

We denote  $\Pi_s$  in Scenario 2 (defined in Appendix C) as  $\Pi_s^2$ . In Scenario 2, designers incorporate the equilibrium subset ( $\bar{r}$ ) of all the disclosed objectives. In this case, the seeker solves the following optimization problem:

$$\max_{S_r \leq \bar{S}_r} \Pi_s^2(S_r; S_g) = \max_{S_r \leq \bar{S}_r} [w \cdot \bar{r}(N_2^*(S_r)) + \mu \ln(m^*(S_g, N_2^*(S_r)) \cdot N_2^*(S_r))], \quad (\text{EC.5})$$

where  $N_2^*$  is from Equation (A.6), and  $m^*$  and  $\bar{r}$  are from Theorem 1.

Now we show  $\frac{\partial \Pi_s^2}{\partial S_r} < 0$ , i.e.,  $\Pi_s^2(S_r; S_g)$  is monotonically decreasing w.r.t  $S_r$ . Note that,  $\Pi_s^2(S_r; S_g)$  is a function of  $S_r$  only through  $N_2^*$ ; hence, we can write

$$\frac{\partial \Pi_s^2}{\partial S_r} = \frac{\partial \Pi_s^2}{\partial N_2^*} \cdot \frac{\partial N_2^*(S_r)}{\partial S_r}, \quad (\text{EC.6})$$

in which we know that  $\frac{\partial N_2^*(S_r)}{\partial S_r} \leq 0$  (see the proof in Appendix A). Now we show  $\frac{\partial \Pi_s^2}{\partial N_2^*} > 0$ :

$$\frac{\partial \Pi_s^2}{\partial N_2^*} = w \frac{\partial \bar{r}(N_2^*)}{\partial N_2^*} + \mu \frac{1}{(N_2^*)^2 - N_2^*} = \frac{1}{(N_2^*)^2 - N_2^*} \cdot \frac{w}{\ln(1/p)} \cdot \left( \frac{\mu \ln(1/p)}{w} + 2 - N_2^* \right). \quad (\text{EC.7})$$

Based on Equation (A.6), the last term in Equation (EC.7) can be re-written as  $\frac{\mu \ln(1/p)}{w} + 2 - N_2^* = \frac{1}{X} + 2 - \frac{\sqrt{4Y(X+1)+X^2}-X}{2Y}$ , which can be shown to be positive using algebra. With all the terms in Equation (EC.7) being positive (by assumption,  $N_2^* > 1$ ),  $\frac{\partial \Pi_s^2}{\partial N_2^*} \geq 0$ . Combining  $\frac{\partial N_2^*(S_r)}{\partial S_r} \leq 0$  and  $\frac{\partial \Pi_s^2}{\partial N_2^*} \geq 0$ , we have  $\frac{\partial \Pi_s^2}{\partial S_r} \leq 0$  (Equation (EC.6)). That is, the seeker profit is monotonically decreasing with respect to the number of disclosed objectives in the problem specification in Scenario 2.
